# Supplementary material for: Likelihood-free nested sampling for parameter inference of biochemical reaction networks
Source: PubMed Central journal article supplement (PMC7577508; doi:10.1371/journal.pcbi.1008264), 2020-10-09
Supplement: pcbi.1008264.s002.pdf [file pcbi.1008264.s002.pdf]

## S2 Parallelization schemes

### S2.1 Parallelization in [3, 6, 5]

We briefly discuss parallelization schemes for NS as they have been discussed in several other places like [3, 6, 5] to better illustrate the difference between our suggested scheme.

In [5] and [3] the parallel algorithm is in principle run like the sequential version, only that at each iteration  $i$  not one particle is sampled from  $\pi(\theta|l(\theta) > \epsilon_i)$  but  $r$ . The key observation is that any particle  $\theta^*$  sampled from  $\pi(\theta|l(\theta) > \epsilon_i)$  can also be accepted at iteration  $j > i$  if  $l(\theta^*) > \epsilon_j$ . Thus at each iteration  $i$  any particle for which a likelihood gets computed, beyond the first accepted particle, is used in a subsequent iteration if its likelihood is high enough.

While this provides an intuitive parallelization of the process, the  $r$  particles at each iteration  $i$  are sampled from  $\pi(\theta|l(\theta) > \epsilon_i)$  but are accepted only if their respective likelihoods are higher than a sequence of increasing thresholds  $\epsilon_i < \epsilon_{i+1} < \dots < \epsilon_{i+r-1}$ , which may result in discarding already sampled particles. Even despite this theoretical drawback, this method works in practice very well as demonstrated in [5]. However it seems to us wasteful to potentially discard already sampled particles.

In [6] the authors suggest to parallelize NS by removing  $r$  particles with the lowest  $r$  likelihoods from the live set at each iteration  $i$  rather than just one particle. The new threshold  $\epsilon_i$  is taken to be the largest likelihood of these removed  $r$  samples and since  $r$  new particles are sampled independently from the same distribution  $\pi(\theta|l(\theta) > \epsilon_i)$ , this is done in parallel. This results in a faster compression of the prior mass, the new particle  $\theta^*$  is sampled from the right distribution  $\pi(\theta|l(\theta) > \epsilon_i)$  and the process is run in parallel. However, the authors in [6] argue that to achieve a similarly low variance of  $t_r$  as for  $t_1$  one needs to use a higher number of NS samples  $N_r$  for the parallel NS algorithm with  $r$  parallel processes, which compares to the number of NS samples  $N_1$  used for sequential NS through  $N_r \approx \sqrt{r}N_1$  particles.

### S2.2 Numerical parallelization example

In section 2.2 we described our parallelization scheme. The difference to the parallelization schemes in [6] is how we weight the particles for the evidence approximation.

We denote with  $t_j$  the random number that is distributed as the  $j^{\text{th}}$  highest number among  $N$  uniform numbers on the interval  $[0, 1]$

Assume at the beginning of iteration  $i$  the prior mass corresponding to the live particles is  $x_{i-1,r}$ . The prior volume shrinkage after removing  $\theta_{i,1}$  is just the same as for regular nested sampling  $x_{i,1} = t_1 x_{i-1,r}$ , since  $\theta_{i,1}$  is the particle with the lowest likelihood among  $N$  uniformly distributed particles over  $\pi(\theta|l(\theta) > \epsilon_{i-1,r})$ . After removing the next particle  $\theta_{i,2}$  the remaining prior volume is  $x_{i,2} = t_2 x_{i-1,r}$ . Thus, each prior volume can be written as  $x_{i,j} = t_j x_{i-1,r}$  (with the obvious boundary condition  $x_{0,r} = 1$ ). The variance of  $t_r$  is monotonically increasing until  $r = \frac{N+1}{2}$  and decreases then again, thus the variance of each  $t_j$  can be upper bound by the variance of  $t_r$  as long as  $r \leq \frac{N+1}{2}$  (otherwise it can be upper bounded by the variance of  $t_{r'}$  with  $r' = \frac{N+1}{2}$ ).

We denote the Bayesian evidence approximation, using all samples  $\epsilon_{i,j}$  up to  $\epsilon_{m,k}$  with

$$\tilde{Z}_{\mathcal{D}}^{m,k} = \sum_{i=1}^{m-1} \sum_{j=1}^r \epsilon_{i,j} (x_{i,j-1} - x_{i,j}) + \sum_{j=1}^k \epsilon_{m,j} (x_{m,j-1} - x_{m,j})$$

We illustrate the variance of the Bayesian evidence estimation on a small example. We assumed a likelihood function  $l(\theta) = 100 \exp(-100\theta)$  with  $\Omega = [0, 1]$ , and ran the LF-NS algorithm for this example. In this example, the prior volume  $x_{i,j}$  corresponding to the parameter  $\theta_{i,j}$  is equal to this parameter  $x_{i,j} = \theta_{i,j}$ . In

Figure S1 A we plotted the resulting values for  $\tilde{Z}_{\mathcal{D}}^{i,j}$  for each value  $1 \leq i \leq m$  and  $1 \leq j \leq r$ . We ran 2000/ $r$

iterations for different values of  $N$  and  $r$ . The resulting estimations of  $\tilde{Z}_{\mathcal{D}}^{i,j}$  and the corresponding standard deviations are shown in Figure S1 A and B. As can be seen when taking the same value for  $N$ , the parallel version with  $r = 20$  has a slighter higher variance. However, when increasing the number of NS particles to  $N_r = N + r = 120$  the variance decreases compared to the sequential case ( $r = 1$ ). Note that the speed up of the parallel version compared to the sequential version is a factor of  $r$ .

## References

- [1] Nikolas S Burkoff, Csilla Várnai, Stephen A Wells, and David L Wild. Exploring the energy landscapes of protein folding simulations with bayesian computation. *Biophysical journal*, 102(4):878–886, 2012.
- [2] Nicolas Chopin and Christian P Robert. Properties of nested sampling. *Biometrika*, 97(3):741–755, 2010.
- [3] F Feroz, MP Hobson, and M Bridges. Multinest: an efficient and robust bayesian inference tool for cosmology and particle physics. *Monthly Notices of the Royal Astronomical Society*, 398(4):1601–1614, 2009.
- [4] F Feroz, MP Hobson, E Cameron, and AN Pettitt. Importance nested sampling and the multinest algorithm. *arXiv preprint arXiv:1306.2144*, 2013.
- [5] WJ Handley, MP Hobson, and AN Lasenby. Polychord: next-generation nested sampling. *Monthly Notices of the Royal Astronomical Society*, 453(4):4384–4398, 2015.
- [6] R Wesley Henderson and Paul M Goggans. Parallelized nested sampling. In *AIP Conference Proceedings*, volume 1636, pages 100–105. AIP, 2014.
- [7] Edward Higson, Will Handley, Mike Hobson, Anthony Lasenby, et al. Sampling errors in nested sampling parameter estimation. *Bayesian Analysis*, 2018.
- [8] Rob Johnson, Paul Kirk, and Michael PH Stumpf. Sysbions: nested sampling for systems biology. *Bioinformatics*, 31(4):604–605, 2015.
- [9] Charles R Keeton. On statistical uncertainty in nested sampling. *Monthly Notices of the Royal Astronomical Society*, 414(2):1418–1426, 2011.
- [10] Christian P Robert and Darren Wraith. Computational methods for bayesian model choice. In *AIP Conference Proceedings*, volume 1193, pages 251–262. AIP, 2009.
- [11] John Skilling et al. Nested sampling for general bayesian computation. *Bayesian analysis*, 1(4):833–859, 2006.
