# Supplementary material for: Likelihood-free nested sampling for parameter inference of biochemical reaction networks
Source: PubMed Central journal article supplement (PMC7577508; doi:10.1371/journal.pcbi.1008264), 2020-10-09

**A**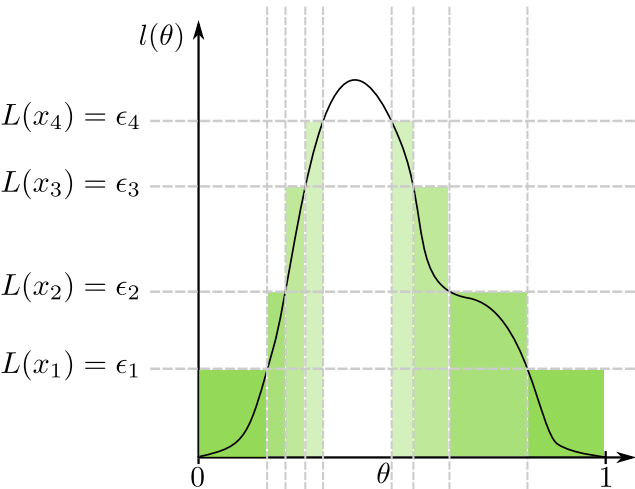

$$x_0 = 1$$

$$x_1 = x(\epsilon_1)$$

$$x_2 = x(\epsilon_2)$$

$$x_3 = x(\epsilon_3)$$

$$x_4 = x(\epsilon_4)$$

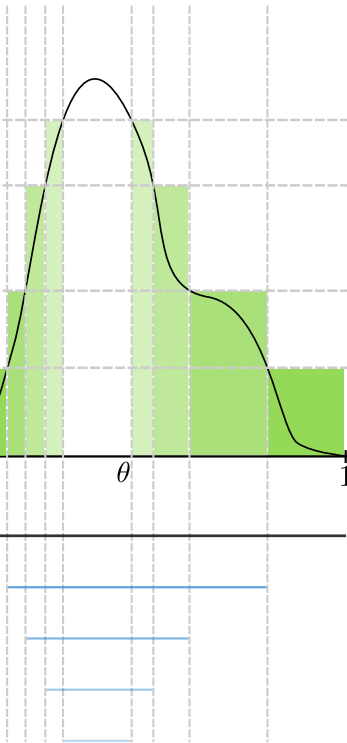**B**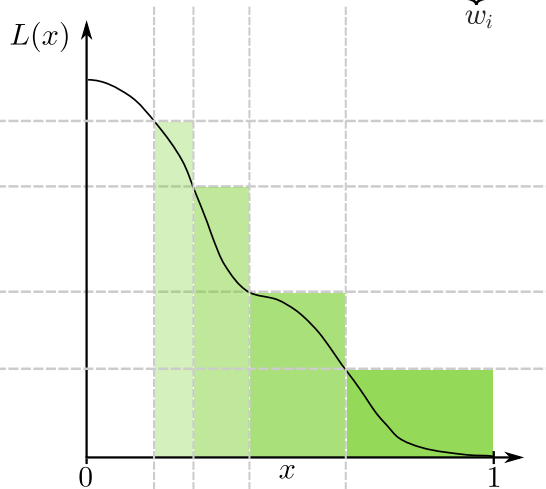

$$x_0 = 1$$

$$x_1 = x(\epsilon_1)$$

$$x_2 = x(\epsilon_2)$$

$$x_3 = x(\epsilon_3)$$

$$x_4 = x(\epsilon_4)$$

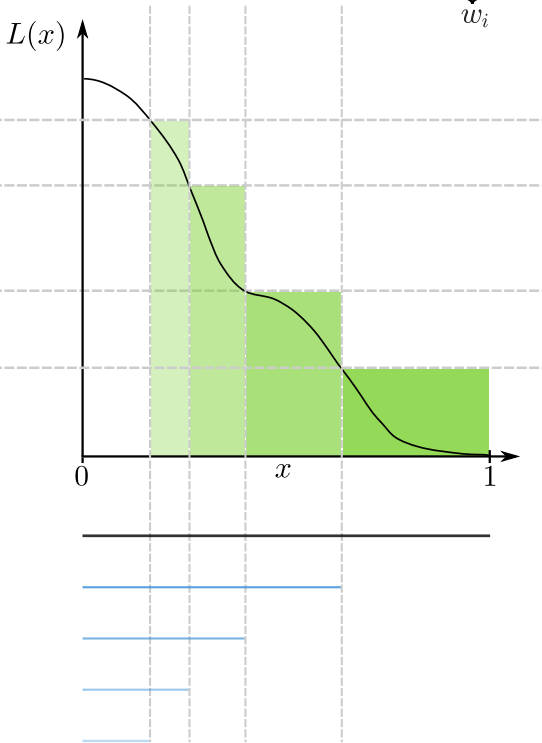

Supplement: pcbi.1008264.s009.pdf [file pcbi.1008264.s009.pdf]
