# Supplementary material for: Likelihood-free nested sampling for parameter inference of biochemical reaction networks
Source: PubMed Central journal article supplement (PMC7577508; doi:10.1371/journal.pcbi.1008264), 2020-10-09

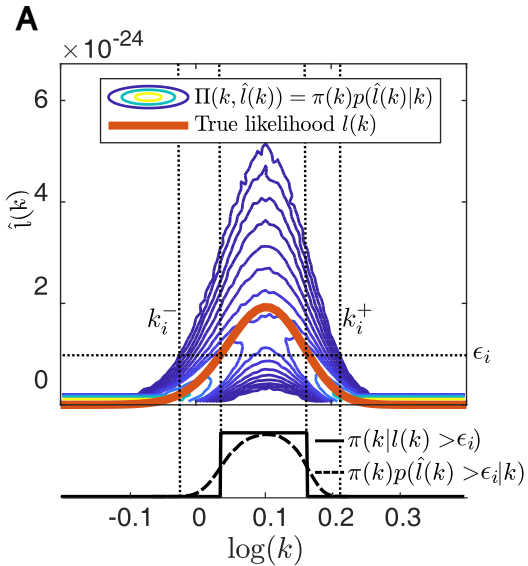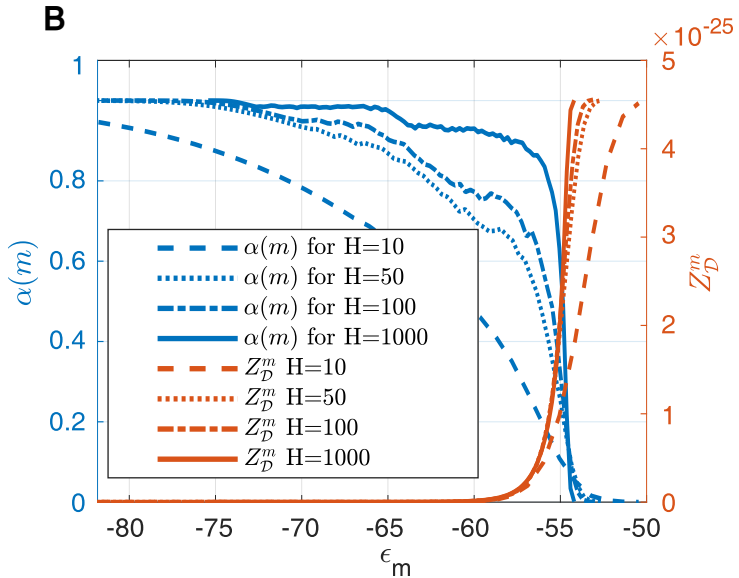

Supplement: pcbi.1008264.s012.pdf [file pcbi.1008264.s012.pdf]
