# Supplementary material for: Likelihood-free nested sampling for parameter inference of biochemical reaction networks
Source: PubMed Central journal article supplement (PMC7577508; doi:10.1371/journal.pcbi.1008264), 2020-10-09

$\theta^*$     LF-NS posterior     $F = 0$      $F = 38$      $F = 76$      $F = 114$      $F = 152$      $F = 190$

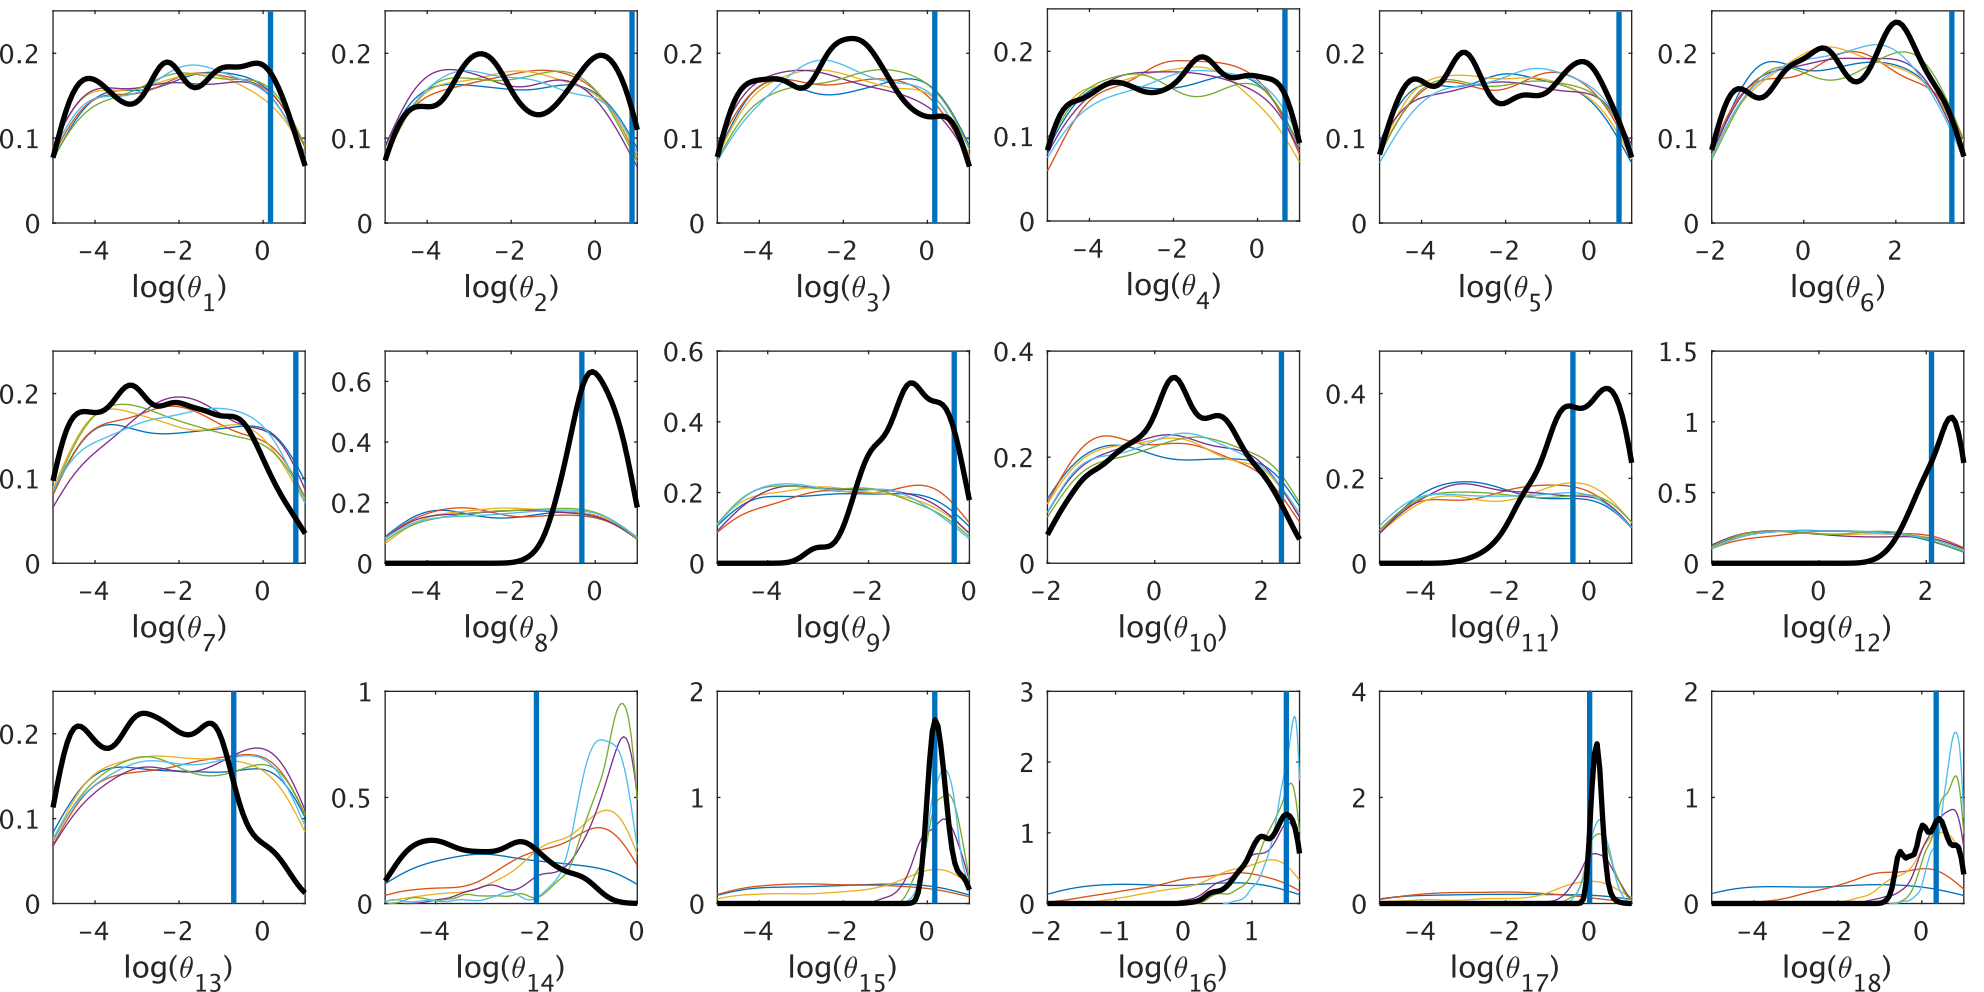

Supplement: pcbi.1008264.s018.pdf [file pcbi.1008264.s018.pdf]
