# Supplementary material for: Likelihood-free nested sampling for parameter inference of biochemical reaction networks
Source: PubMed Central journal article supplement (PMC7577508; doi:10.1371/journal.pcbi.1008264), 2020-10-09
Supplement: pcbi.1008264.s022.pdf [file pcbi.1008264.s022.pdf]

**Table S2:** Prior distributions of the Lac-GFP parameters and the real values  $\theta^*$  used for the simulation of  $\mathbf{y}$ .

| Parameter     | Meaning                                              | Prior interval  | $\theta^*$ |
|---------------|------------------------------------------------------|-----------------|------------|
| $\theta_1$    | lacI transcription rate                              | $[10^{-5}, 10]$ | 1.5        |
| $\theta_2$    | lacI degradation rate                                | $[10^{-5}, 10]$ | 7.5        |
| $\theta_3$    | LACI translation rate                                | $[10^{-5}, 10]$ | 1.5        |
| $\theta_4$    | IPTG-independent LACI degradation rate               | $[10^{-5}, 10]$ | 4.5        |
| $\theta_5$    | IPTG-induced increase in LACI degradation rate       | $[10^{-5}, 10]$ | 5          |
| $\theta_6$    | Dimerization rate of LACI                            | $[0.1, 3000]$   | 1650       |
| $\theta_7$    | Dissociation rate of LACI dimers                     | $[10^{-5}, 10]$ | 6          |
| $\theta_8$    | Binding rate of LACI dimers to Lac promoter          | $[10^{-5}, 10]$ | 0.48       |
| $\theta_9$    | Dissociation rate of LACI dimers from Lac promoter   | $[10^{-5}, 1]$  | 0.5        |
| $\theta_{10}$ | Tetramerization rate of LACI                         | $[0.01, 500]$   | 230        |
| $\theta_{11}$ | Dissociation rate of LACI tetramers                  | $[10^{-5}, 10]$ | 0.4        |
| $\theta_{12}$ | gfp transcription rate from free PLac promoter       | $[0.01, 500]$   | 125        |
| $\theta_{13}$ | gfp transcription rate from LACI dimer-bound PLac    | $[10^{-5}, 10]$ | 0.2        |
| $\theta_{14}$ | gfp transcription rate from LACI tetramer-bound PLac | $[10^{-5}, 1]$  | 0.01       |
| $\theta_{15}$ | gfp degradation rate                                 | $[10^{-5}, 10]$ | 1.5        |
| $\theta_{16}$ | GFP translation rate                                 | $[0.01, 50]$    | 32         |
| $\theta_{17}$ | GFP degradation rate                                 | $[10^{-5}, 10]$ | 1          |
| $\theta_{18}$ | GFP maturation rate                                  | $[10^{-5}, 10]$ | 2.2        |

For all the Lac-Gfp inference problems presented in this paper, each parameter was assigned an independent uniform log prior distribution in the interval listed in the table.
