# Supplementary material for: Likelihood-free nested sampling for parameter inference of biochemical reaction networks
Source: PubMed Central journal article supplement (PMC7577508; doi:10.1371/journal.pcbi.1008264), 2020-10-09
Supplement: pcbi.1008264.s023.pdf [file pcbi.1008264.s023.pdf]

**Table S3:** Prior distributions of the parameters for the transcription model.

| Parameter        | Meaning                 | Prior interval   |
|------------------|-------------------------|------------------|
| $k_{\text{on}}$  | promoter binding rate   | $[10^{-5}, 100]$ |
| $k_{\text{off}}$ | promoter unbinding rate | $[10^{-5}, 100]$ |
| $k_{\text{r}}$   | mRNA transcription      | $[0.1, 500]$     |
| $\lambda$        | transcription rate      | $[2, 8]$         |

For the transcription model inference problem presented in this paper, each parameter was assigned an independent uniform log prior distribution in the interval listed in the table.
