# Supplementary material for: Likelihood-free nested sampling for parameter inference of biochemical reaction networks
Source: PubMed Central journal article supplement (PMC7577508; doi:10.1371/journal.pcbi.1008264), 2020-10-09
Supplement: pcbi.1008264.s024.pdf [file pcbi.1008264.s024.pdf]

**Table S4:** Species and initial numbers of the Lotka-Volterra model

| Species  | Notation | Initial Distribution | Value used for data simulation |
|----------|----------|----------------------|--------------------------------|
| Prey     | $X_1$    | Poisson(50)          | 50                             |
| Predator | $X_2$    | Poisson(100)         | 100                            |
