# Supplementary material for: Likelihood-free nested sampling for parameter inference of biochemical reaction networks
Source: PubMed Central journal article supplement (PMC7577508; doi:10.1371/journal.pcbi.1008264), 2020-10-09
Supplement: pcbi.1008264.s025.pdf [file pcbi.1008264.s025.pdf]

**Table S5:** Prior distributions of the parameters for the Lotka-Voltera model.

| Parameter | Meaning                     | Prior interval         | $\theta^*$ |
|-----------|-----------------------------|------------------------|------------|
| $c_1$     | Prey birth                  | $[\exp(-6.2) \exp(2)]$ | 1          |
| $c_2$     | Predator consumptin of Prey | $[\exp(-6.2) \exp(2)]$ | 0.005      |
| $c_3$     | Predator death              | $[\exp(-6.2) \exp(2)]$ | 0.6        |

For the Lotka-Voltera model inference problem presented in this paper, each parameter was assigned an independent uniform log prior distribution in the interval listed in the table.
