# Supplementary material for: Likelihood-free nested sampling for parameter inference of biochemical reaction networks
Source: PLOS journal article supplement (doi:10.1371/journal.pcbi.1008264), 2020-10-09
Supplement: S21 (10.1371/journal.pcbi.1008264.s021) [file journal.pcbi.1008264.s021]

**Table S1:** Species and initial numbers of the Lac-Gfp model

| Species                                                | Notation     | Initial Distribution |
|--------------------------------------------------------|--------------|----------------------|
| LacI mRNA                                              | <i>lacI</i>  | U([0, 5])            |
| LacI protein monomer                                   | <i>LACI</i>  | U([0, 10])           |
| LacI dimer                                             | <i>LACI2</i> | fixed to 0           |
| Unoccupied (active) Lac promoter                       | <i>PLac</i>  | fixed to 0           |
| Occupied Lac promoter with 2 repressor molecules bound | <i>O2Lac</i> | fixed to 0           |
| Occupied Lac promoter with 4 repressor molecules bound | <i>O4Lac</i> | U([50, 70])          |
| GFP mRNA                                               | <i>gfp</i>   | fixed to 0           |
| “Dark” GFP protein                                     | <i>GFP</i>   | fixed to 0           |
| Mature GFP protein                                     | <i>mGFP</i>  | fixed to 0           |

U( $[a, b]$ ) denotes the uniform distribution on the interval  $[a, b]$ .
